# Supplementary material
Source: PubMed Central journal article supplement (PMC6672037)

## **Supplemental Data**

### **A genome wide association study on lipoprotein(a) levels and coronary artery disease severity in a Chinese population**

Yibin Liu<sup>1,2#</sup>, Hongkun Ma<sup>1,2#</sup>, Qian Zhu<sup>2</sup>, Bin Zhang<sup>2</sup>, Hong Yan<sup>1,2</sup>, Hanping Li<sup>1,2</sup>, Jinxiu Meng<sup>1,2</sup>, Weihua Lai<sup>3</sup>, Liwen Li<sup>2\*</sup>, Danqing Yu<sup>2\*</sup>, Shilong Zhong<sup>1,2,3\*</sup>

<sup>1</sup>Guangdong General Hospital, School of Medicine, South China University of Technology, Guangzhou, Guangdong 510080, China.

<sup>2</sup>Guangdong Provincial Key Laboratory of Coronary Heart Disease Prevention, Guangdong Cardiovascular Institute, Guangdong General Hospital, Guangdong Academy of Medical Sciences, Guangzhou, Guangdong 510080, China.

<sup>3</sup> Department of Pharmacy of Guangdong General Hospital, Guangdong Academy of Medical Sciences, Guangzhou 510080, China

## **Supplemental materials**

### **Comparison of characteristics of patients within the two statins subgroups**

The subjects included in this study received atorvastatin(AT) or rosuvastatin(RST). We compared the characteristics of the patients within the two statins subgroups. Data are presented as counts (%) for categorical variables and mean  $\pm$  standard deviation for continuous variables. The homogeneity of the subgroups was assessed by the Student's t-test or  $\chi^2$  test to baseline data. As shown in Supplemental Table S1, the lipoprotein(a)(Lp[a]) level ( $30.83 \pm 33.06$  in AT users versus  $28.74 \pm 28.80$  in RST users) and SYNTAX score ( $17.20 \pm 10.32$  in AT users versus  $17.87 \pm 11.12$  in RST users) of the two subgroups did not exhibit significant differences ( $P > 0.05$ ). This result indicates a homogeneity between the two subgroups and minimal bias in the subsequent analysis on the overall cohort. Notably, the total cholesterol (TC) and low-density lipoprotein cholesterol (LDLC) levels in RST users were higher than those of the AT users ( $P < 0.05$ ). This result agrees with the effect of medication in clinical treatment because the RST has a stronger TC lowering effect than AT and physicians are likely to prescribe RST to patients with high levels of TC and LDLC.

### **Quantification of KIV-2 copy number variation**

We randomly selected 645 subjects and used real-time fluorescence quota PCR for the relative quantification of the copy number of KIV-2 in the LPA gene by using the Bio-RAD CFX96 system and 96-well formats to evaluate the independence of Lp(a)-associated SNPs from KIV-2 CNV.

First, we synthesized the TaqMan® probe and primer for LPA KIV-2 exon2 in accordance with the study of Kamstrup PR(1). The probe and primers sequence were as follows:

Probe labeled by FAM 5'-CAACCTGACGCAATGC-3';

Forward primer 5'-ATCCAGATGCTGTGGCAGCT-3';

Reverse primer 5'-GCGACGGCAGTCCCTTCT-3'.

We used the RNase P (RNAP) control reagent (Part Number 4316844) as an endogenous single-copy control gene in accordance with Matthew B's method(2). The reaction volumes

included 1.25 uL of 20× TaqMan® primer/probe mix for LPA KIV-2; 1.25 uL of 20× TaqMan® RNAP control reagent, which was used as an endogenous single-copy control gene; 12.5 uL of 2× gene expression GX master mix; 5 uL of water; and 4 uL of genomic DNA. The thermocycler conditions were as follows: 95 °C hot-start for 10 min, followed by 40 cycles at 95 °C for 15 s, and 63 °C for 1 min. A disparity of 0.25 or more in CT value between the two duplicate samples was considered an error and required the sample to be rerun.  $\Delta$ CT values were obtained by subtracting the CT value of the single-copy gene from the CT value of KIV-2 and were used to represent KIV-2 CNV.

**Previously reported Lp(a)-associated SNPs in the present study.**

We explored the replication of some previously reported SNPs in our data. For example, studies on Caucasian populations reported that rs3798220 and rs7412 in the LPA gene are related to Lp(a) levels. However, we found that they were nominally associated with Lp(a) levels (MAF = 0.09 and P = 0.0039 for rs3798220 and MAF = 0.06 and P = 0.0183 for rs7412). Other published SNPs (e.g., rs10455872 and rs143431368) were also included in our genotyping panel, but these SNPs were all rare in the Chinese population (both with MAF < 0.01 in our cohort and in 1KGP subjects). A full detailed list of reported SNPs associated with Lp(a) levels is shown in Table S4.

## Reference

1. Kamstrup, P. R., A. Tybjaerg-Hansen, R. Steffensen, and B. G. Nordestgaard. 2009. Genetically elevated lipoprotein(a) and increased risk of myocardial infarction. *Jama* **301**: 2331-2339.
2. Lanktree, M. B., C. Rajakumar, J. H. Brunt, M. L. Koschinsky, P. W. Connelly, and R. A. Hegele. 2009. Determination of lipoprotein(a) kringle repeat number from genomic DNA: copy number variation genotyping using qPCR. *Journal of lipid research* **50**: 768-772.

## Supplemental Tables

**Supplemental Table S1: Baseline Characteristics of the subgroups with two different statins medication**

| Characteristics                          | Subgroups comparison |                   |         |
|------------------------------------------|----------------------|-------------------|---------|
|                                          | AT Users (n=1013)    | RST Users (n=390) | P value |
| <b>Demographic data</b>                  |                      |                   |         |
| Age                                      | 63.00 ± 10.07        | 62.04 ± 10.02     | 0.111   |
| Sex (male)                               | 807 (79.7)           | 312 (80.0)        | 0.889   |
| BMI, kg/m <sup>2</sup>                   | 24.25 ± 4.81         | 24.30 ± 3.35      | 0.854   |
| <b>Comorbidities</b>                     |                      |                   |         |
| Arrhythmia                               | 91 (9.0)             | 15 (3.8)          | 0.001   |
| Diabetes                                 | 278 (27.4)           | 107 (27.4)        | 0.998   |
| Heart failure                            | 89 (8.8)             | 31 (7.9)          | 0.615   |
| Hypertension                             | 609 (60.1)           | 207 (53.1)        | 0.017   |
| Hyperlipidemia                           | 117 (11.5)           | 57 (14.6)         | 0.119   |
| <b>Baseline biochemical measurements</b> |                      |                   |         |
| ALT, U/L                                 | 27.51 ± 13.25        | 27.76 ± 14.05     | 0.770   |
| AST, U/L                                 | 26.71 ± 10.70        | 26.74 ± 11.32     | 0.964   |
| CK, U/L                                  | 111.84 ± 112.19      | 106.82 ± 78.98    | 0.359   |
| CREA, umol/L                             | 86.52 ± 25.06        | 85.23 ± 26.06     | 0.133   |
| CKMB, U/L                                | 7.52 ± 5.97          | 7.05 ± 4.12       | 0.397   |
| TC, mmol/L                               | 4.29 ± 1.13          | 4.54 ± 1.49       | 0.003   |
| LDLC, mmol/L                             | 2.59 ± 0.93          | 2.81 ± 1.18       | 0.001   |
| HDLC, mmol/L                             | 0.97 ± 0.26          | 0.99 ± 0.24       | 0.154   |
| TG, mmol/L                               | 1.61 ± 1.13          | 1.62 ± 1.16       | 0.845   |
| GLUC, mmol/L                             | 6.72 ± 2.70          | 6.75 ± 2.69       | 0.818   |

|                   |                  |                  |       |
|-------------------|------------------|------------------|-------|
| Lpa, mg/dL        | 30.83 ± 33.06    | 28.74 ± 28.80    | 0.332 |
| APOA, g/L         | 1.04 ± 0.28      | 1.06 ± 0.27      | 0.406 |
| BNP, pg/mL        | 775.52 ± 1603.38 | 980.12 ± 2719.83 | 0.277 |
| <b>Medication</b> |                  |                  |       |
| β-blockers        | 904 (89.2)       | 350 (89.7)       | 0.821 |
| ACEIs             | 646 (63.8)       | 234 (60.0)       | 0.183 |
| CCBs              | 291 (28.7)       | 85 (21.8)        | 0.008 |
| PPIs              | 488 (48.2)       | 191 (49.0)       | 0.800 |
| SYNTAX score      | 17.20 ± 10.32    | 17.87 ± 11.12    | 0.289 |

Abbreviation as Table 1

**Supplemental Table S2: Association of Lp(a) associated SNPs with CAD severity (as continuous variables)**

| Severity of CAD                         | SNP         | Univariate analysis |         | Adjusted analysis |         |
|-----------------------------------------|-------------|---------------------|---------|-------------------|---------|
|                                         |             | Estimates ± Se      | P value | Estimates ± Se    | P value |
| <b>SYNTAX score</b>                     | rs7770628   | 0.45 ± 0.64         | 0.4815  |                   |         |
|                                         | rs73596816  | 0.37 ± 0.87         | 0.6676  |                   |         |
|                                         | rs6926458   | 0.08 ± 0.40         | 0.8388  |                   |         |
|                                         | rs144217738 | 1.21 ± 0.64         | 0.0614  | 0.88 ± 0.71       | 0.2163  |
| <b>Count of heavy calcified lesions</b> | rs7770628   | 0.01 ± 0.02         | 0.6382  |                   |         |
|                                         | rs73596816  | 0.01 ± 0.03         | 0.7415  |                   |         |
|                                         | rs6926458   | 0.01 ± 0.01         | 0.5936  |                   |         |
|                                         | rs9365171   | 0.03 ± 0.02         | 0.2790  |                   |         |
| <b>Count of long-range lesions</b>      | rs7770628   | 0.07 ± 0.04         | 0.0948  | 0.10 ± 0.05       | 0.0348  |
|                                         | rs73596816  | 0.13 ± 0.06         | 0.0329  | 0.19 ± 0.07       | 0.0044  |
|                                         | rs6926458   | -0.03 ± 0.03        | 0.2303  |                   |         |
|                                         | rs144217738 | 0.05 ± 0.04         | 0.2553  |                   |         |

**Supplemental Table S3: Independence of Lp(a) associated SNP from KIV-2 CNV**

| Locus   | SNP         | N   | Lp(a) associated SNP |                | $\Delta$ CT <sup>a</sup> |                |
|---------|-------------|-----|----------------------|----------------|--------------------------|----------------|
|         |             |     | Beta $\pm$ Se        | P <sup>b</sup> | Beta $\pm$ Se            | P <sup>b</sup> |
| LPA     | rs7770628   | 644 | 0.64 $\pm$ 0.08      | 7.25E-14       | -0.12 $\pm$ 0.04         | 0.0057         |
| LPA     | rs73596816  | 644 | 0.78 $\pm$ 0.11      | 4.58E-12       | -0.13 $\pm$ 0.04         | 0.0040         |
| LPA     | rs6926458   | 644 | -0.30 $\pm$ 0.06     | 6.21E-08       | -0.13 $\pm$ 0.05         | 0.0041         |
| SLC22A2 | rs144217738 | 636 | 0.33 $\pm$ 0.09      | 1.36E-04       | -0.15 $\pm$ 0.05         | 0.0010         |

<sup>a</sup>  $\Delta$  CT values of KIV-2 CNV were included into the original models to evaluate the independence of four Lp(a) associated SNPs from KIV-2 CNV.

<sup>b</sup> P < 0.0125 = 0.05/4 were considered significant.



**Supplemental Table S4: Full list of 61 Lp(a) significantly associated SNPs in GWAS**

| SNP         | EA <sup>a</sup> | N    | Beta  | Se   | P value  | Dependent SNP | LD <sup>b</sup> (r <sup>2</sup> ) |
|-------------|-----------------|------|-------|------|----------|---------------|-----------------------------------|
| rs4708876   | C               | 1145 | 0.73  | 0.06 | 2.01E-30 | rs7770628     | 1                                 |
| rs7770628   | C               | 1147 | 0.73  | 0.06 | 2.29E-30 | -             | -                                 |
| rs56393506  | T               | 1121 | 0.72  | 0.06 | 3.82E-28 | rs7770628     | 1                                 |
| rs7454595   | C               | 1110 | 0.70  | 0.07 | 2.82E-23 | rs7770628     | 0.94                              |
| rs73596816  | A               | 1147 | 0.86  | 0.09 | 1.27E-22 | -             | -                                 |
| rs62442784  | C               | 1129 | -0.34 | 0.04 | 2.81E-16 | rs6926458     | 1                                 |
| rs7770685   | T               | 1129 | -0.34 | 0.04 | 2.81E-16 | rs6926458     | 1                                 |
| rs1406889   | C               | 1128 | -0.34 | 0.04 | 2.94E-16 | rs6926458     | 1                                 |
| rs7761377   | G               | 1115 | -0.34 | 0.04 | 3.65E-16 | rs6926458     | 0.99                              |
| rs13202636  | C               | 1139 | -0.34 | 0.04 | 3.78E-16 | rs6926458     | 1                                 |
| rs1830522   | T               | 1126 | -0.34 | 0.04 | 3.96E-16 | rs6926458     | 1                                 |
| rs6926896   | G               | 1140 | -0.34 | 0.04 | 4.10E-16 | rs6926458     | 1                                 |
| rs35600881  | A               | 1141 | -0.34 | 0.04 | 4.18E-16 | rs6926458     | 1                                 |
| rs6940254   | G               | 1141 | -0.34 | 0.04 | 4.18E-16 | rs6926458     | 1                                 |
| rs9355297   | G               | 1141 | -0.34 | 0.04 | 4.18E-16 | rs6926458     | 1                                 |
| rs6926458   | G               | 1147 | -0.34 | 0.04 | 4.59E-16 | -             | -                                 |
| rs12175867  | C               | 1142 | -0.34 | 0.04 | 4.93E-16 | rs6926458     | 1                                 |
| rs113727842 | G               | 1129 | -0.33 | 0.04 | 1.33E-15 | rs6926458     | 0.99                              |
| rs6455696   | C               | 1129 | -0.33 | 0.04 | 1.33E-15 | rs6926458     | 0.99                              |
| rs36115561  | T               | 1128 | -0.33 | 0.04 | 1.45E-15 | rs6926458     | 0.99                              |
| rs6905073   | T               | 1128 | -0.33 | 0.04 | 1.45E-15 | rs6926458     | 0.99                              |
| rs6905422   | C               | 1128 | -0.33 | 0.04 | 1.45E-15 | rs6926458     | 0.99                              |
| rs6933576   | G               | 1128 | -0.33 | 0.04 | 1.45E-15 | rs6926458     | 0.99                              |
| rs6929299   | C               | 1133 | -0.33 | 0.04 | 1.54E-15 | rs6926458     | 0.99                              |
| rs10945682  | A               | 1129 | -0.33 | 0.04 | 1.71E-15 | rs6926458     | 0.99                              |
| rs10945683  | C               | 1129 | -0.33 | 0.04 | 1.71E-15 | rs6926458     | 0.99                              |

|            |   |      |       |      |          |           |      |
|------------|---|------|-------|------|----------|-----------|------|
| rs1569933  | T | 1129 | -0.33 | 0.04 | 1.71E-15 | rs6926458 | 0.99 |
| rs2983236  | G | 1129 | -0.33 | 0.04 | 1.71E-15 | rs6926458 | 0.99 |
| rs7760585  | G | 1129 | -0.33 | 0.04 | 1.71E-15 | rs6926458 | 0.99 |
| rs9295130  | A | 1129 | -0.33 | 0.04 | 1.71E-15 | rs6926458 | 0.99 |
| rs1950563  | C | 1128 | -0.33 | 0.04 | 1.78E-15 | rs6926458 | 0.99 |
| rs1950564  | T | 1128 | -0.33 | 0.04 | 1.78E-15 | rs6926458 | 0.99 |
| rs2144726  | A | 1128 | -0.33 | 0.04 | 1.78E-15 | rs6926458 | 0.99 |
| rs9355815  | G | 1134 | -0.33 | 0.04 | 1.86E-15 | rs6926458 | 0.99 |
| rs6455695  | C | 1138 | -0.33 | 0.04 | 1.94E-15 | rs6926458 | 0.99 |
| rs6919497  | G | 1138 | -0.33 | 0.04 | 1.94E-15 | rs6926458 | 0.99 |
| rs6923917  | T | 1138 | -0.33 | 0.04 | 1.94E-15 | rs6926458 | 0.99 |
| rs6937879  | A | 1138 | -0.33 | 0.04 | 1.94E-15 | rs6926458 | 0.99 |
| rs9355813  | C | 1138 | -0.33 | 0.04 | 1.94E-15 | rs6926458 | 0.99 |
| rs9355814  | T | 1138 | -0.33 | 0.04 | 1.94E-15 | rs6926458 | 0.99 |
| rs6415085  | G | 1139 | -0.33 | 0.04 | 1.98E-15 | rs6926458 | 0.99 |
| rs6455691  | A | 1139 | -0.33 | 0.04 | 1.98E-15 | rs6926458 | 0.99 |
| rs6455692  | A | 1139 | -0.33 | 0.04 | 1.98E-15 | rs6926458 | 0.99 |
| rs6455693  | T | 1139 | -0.33 | 0.04 | 1.98E-15 | rs6926458 | 0.99 |
| rs6902102  | A | 1139 | -0.33 | 0.04 | 1.98E-15 | rs6926458 | 0.99 |
| rs6930342  | G | 1139 | -0.33 | 0.04 | 1.98E-15 | rs6926458 | 0.99 |
| rs6932014  | G | 1139 | -0.33 | 0.04 | 1.98E-15 | rs6926458 | 0.99 |
| rs9365179  | T | 1139 | -0.33 | 0.04 | 1.98E-15 | rs6926458 | 0.99 |
| rs6913833  | C | 1139 | -0.33 | 0.04 | 2.12E-15 | rs6926458 | 0.99 |
| rs7771129  | G | 1139 | -0.33 | 0.04 | 2.12E-15 | rs6926458 | 1    |
| rs9456552  | T | 1138 | -0.33 | 0.04 | 2.17E-15 | rs6926458 | 0.99 |
| rs13192132 | C | 1140 | -0.33 | 0.04 | 2.31E-15 | rs6926458 | 0.99 |
| rs7752408  | C | 1140 | -0.33 | 0.04 | 2.31E-15 | rs6926458 | 0.99 |
| rs2092931  | G | 1126 | -0.33 | 0.04 | 2.39E-15 | rs6926458 | 0.99 |

|             |   |      |       |      |          |           |      |
|-------------|---|------|-------|------|----------|-----------|------|
| rs2872764   | G | 1126 | -0.33 | 0.04 | 2.39E-15 | rs6926458 | 0.99 |
| rs1321196   | C | 1121 | -0.33 | 0.04 | 3.02E-15 | rs6926458 | 0.99 |
| rs1740428   | A | 1125 | -0.33 | 0.04 | 3.57E-15 | rs6926458 | 0.99 |
| rs138400966 | C | 1106 | -0.33 | 0.04 | 5.53E-15 | rs6926458 | 0.99 |
| rs7769720   | T | 1120 | -0.32 | 0.04 | 1.06E-14 | rs6926458 | 0.99 |
| rs9365171   | A | 1147 | -0.31 | 0.04 | 1.23E-12 | rs6926458 | 0.64 |
| rs144217738 | G | 1136 | 0.34  | 0.06 | 6.90E-08 | -         | -    |

---

<sup>a</sup>EA: effect allele

<sup>b</sup>LD: linkage disequilibrium

**Supplemental Table S5: Full list of reported Lp(a) associated SNPs**

| CHR:BP      | SNP        | EA | N    | Beta  | Se   | P      | Reference (PMID)  |
|-------------|------------|----|------|-------|------|--------|-------------------|
| 6:160894878 | rs1510224  | C  | 1126 | -0.26 | 0.08 | 0.0011 | 28512139          |
| 6:160961137 | rs3798220  | C  | 1147 | -0.22 | 0.08 | 0.0039 | 28566218          |
| 6:161082695 | rs1367211  | T  | 1147 | -0.14 | 0.05 | 0.0121 | 26377243          |
| 6:154896235 | rs17539620 | T  | 1111 | 0.13  | 0.05 | 0.0161 | 26377243          |
| 19:45412079 | rs7412     | T  | 1147 | -0.20 | 0.08 | 0.0183 | 29875488;29777097 |
| 6:160767905 | rs520829   | G  | 1111 | -0.10 | 0.05 | 0.0408 | 28512139          |
| 6:159335251 | rs9457516  | T  | 1147 | 0.10  | 0.05 | 0.0445 | 25575512          |
| 6:161586840 | rs729986   | T  | 1147 | -0.10 | 0.05 | 0.0505 | 19124843          |
| 6:159721945 | rs10806706 | A  | 1123 | -0.09 | 0.05 | 0.0572 | 19124843          |
| 6:154005613 | rs2186140  | C  | 1092 | -0.07 | 0.04 | 0.119  | 19124843          |
| 6:160741622 | rs3120139  | A  | 1147 | 0.08  | 0.05 | 0.1488 | 21900290          |
| 6:161137779 | rs14224    | C  | 1121 | 0.06  | 0.04 | 0.1709 | 19124843          |
| 6:161137990 | rs783147   | G  | 1147 | 0.05  | 0.04 | 0.2112 | 21900290          |
| 14:89375249 | rs10484009 | T  | 1144 | 0.06  | 0.05 | 0.2525 | 17903299          |
| 6:156916766 | rs9384478  | A  | 1147 | -0.05 | 0.05 | 0.2612 | 25575512          |
| 8:107812675 | rs2930485  | G  | 1110 | -0.06 | 0.06 | 0.2761 | 17903299          |
| 6:159436594 | rs2057061  | G  | 1119 | -0.05 | 0.04 | 0.2862 | 19124843          |
| 6:162996263 | rs9458611  | T  | 1119 | -0.06 | 0.05 | 0.2875 | 19124843          |
| 6:159723503 | rs4708818  | G  | 1119 | 0.05  | 0.05 | 0.3124 | 19124843          |
| 6:159167285 | rs9456350  | G  | 1136 | 0.06  | 0.07 | 0.3259 | 19124843          |
| 6:156628874 | rs9397922  | C  | 1147 | -0.04 | 0.04 | 0.3475 | 19124843          |
| 6:157443353 | rs6917698  | G  | 1103 | 0.05  | 0.05 | 0.3572 | 19124843          |
| 6:159425707 | rs2016588  | C  | 1101 | -0.04 | 0.04 | 0.3631 | 19124843          |
| 6:161917337 | rs6937817  | C  | 1109 | -0.05 | 0.06 | 0.3691 | 19124843          |
| 6:159105413 | rs1979541  | G  | 1143 | 0.06  | 0.07 | 0.4103 | 26377243          |
| 6:161916248 | rs10755582 | T  | 1143 | -0.05 | 0.06 | 0.4147 | 19124843          |

|             |            |   |      |       |      |        |          |
|-------------|------------|---|------|-------|------|--------|----------|
| 6:161915982 | rs992421   | T | 1143 | -0.05 | 0.06 | 0.4147 | 19124843 |
| 2:227621831 | rs10498211 | A | 1140 | -0.07 | 0.08 | 0.4303 | 17903299 |
| 6:162979147 | rs4636000  | C | 1140 | 0.04  | 0.05 | 0.4352 | 19124843 |
| 6:162994639 | rs2155510  | T | 1138 | 0.04  | 0.05 | 0.453  | 19124843 |
| 6:162994752 | rs1012424  | G | 1132 | 0.03  | 0.05 | 0.4911 | 19124843 |
| 6:160796058 | rs1018234  | T | 1136 | -0.03 | 0.04 | 0.532  | 28512139 |
| 6:162209898 | rs3019433  | A | 1145 | 0.06  | 0.09 | 0.5335 | 19124843 |
| 2:222505204 | rs1356702  | G | 1130 | -0.03 | 0.04 | 0.5385 | 17903299 |
| 6:162210934 | rs3016557  | T | 1144 | 0.05  | 0.09 | 0.5408 | 19124843 |
| 6:158263456 | rs9346930  | G | 1147 | 0.04  | 0.07 | 0.5525 | 25575512 |
| 6:158371084 | rs9347800  | C | 1147 | 0.04  | 0.06 | 0.579  | 25575512 |
| 6:162474893 | rs9456734  | A | 1133 | -0.02 | 0.04 | 0.5966 | 19124843 |
| 6:156969316 | rs1246182  | G | 1126 | 0.02  | 0.04 | 0.6047 | 19124843 |
| 6:159801024 | rs1544167  | G | 1147 | 0.02  | 0.05 | 0.6179 | 25575512 |
| 6:156886834 | rs288945   | A | 1120 | -0.04 | 0.08 | 0.6491 | 19124843 |
| 6:162192994 | rs9458363  | T | 1118 | -0.02 | 0.04 | 0.6636 | 19124843 |
| 6:158219013 | rs9356009  | C | 1147 | 0.03  | 0.06 | 0.674  | 25575512 |
| 6:152820395 | rs2623963  | C | 1106 | -0.02 | 0.05 | 0.7066 | 19124843 |
| 6:156150733 | rs17086702 | T | 1147 | -0.03 | 0.09 | 0.71   | 25575512 |
| 6:152852284 | rs7745725  | G | 1139 | -0.02 | 0.05 | 0.7243 | 19124843 |
| 6:160745751 | rs384156   | C | 1091 | -0.01 | 0.04 | 0.7674 | 19124843 |
| 6:163636248 | rs2206256  | T | 1142 | -0.02 | 0.05 | 0.7747 | 19124843 |
| 6:159340672 | rs9365009  | A | 1147 | 0.01  | 0.05 | 0.776  | 19124843 |
| 6:162248169 | rs2022991  | C | 1147 | -0.01 | 0.04 | 0.7866 | 19124843 |
| 6:163639850 | rs11966842 | C | 1127 | -0.01 | 0.05 | 0.7928 | 19124843 |
| 6:153065487 | rs633596   | G | 1147 | -0.01 | 0.05 | 0.8003 | 19124843 |
| 6:159155998 | rs2129209  | C | 1147 | 0.01  | 0.05 | 0.8196 | 19124843 |
| 6:159146871 | rs6455600  | T | 1147 | 0.01  | 0.05 | 0.831  | 19124843 |

|             |            |   |      |         |      |        |          |
|-------------|------------|---|------|---------|------|--------|----------|
| 6:160868701 | rs2457574  | G | 1143 | 0.01    | 0.04 | 0.8327 | 28512139 |
| 6:160865645 | rs7769879  | C | 1143 | 0.01    | 0.04 | 0.865  | 28512139 |
| 6:160737581 | rs446809   | A | 1130 | 0.01    | 0.04 | 0.8684 | 19124843 |
| 6:162192874 | rs3016562  | G | 1140 | -0.01   | 0.04 | 0.872  | 19124843 |
| 7:112969420 | rs10500024 | G | 1099 | 0.01    | 0.04 | 0.8782 | 17903299 |
| 6:160471191 | rs8191818  | G | 1131 | 0.01    | 0.05 | 0.8934 | 19124843 |
| 6:160966347 | rs9365169  | C | 1145 | 0.01    | 0.04 | 0.8957 | 28512139 |
| 6:162192856 | rs3016563  | C | 1147 | -0.01   | 0.04 | 0.8972 | 19124843 |
| 6:160479478 | rs8191829  | A | 1130 | 0.0047  | 0.05 | 0.9196 | 19124843 |
| 6:161697400 | rs3757037  | G | 1147 | 0.0040  | 0.04 | 0.9251 | 26377243 |
| 6:164982150 | rs2201806  | T | 1110 | 0.0027  | 0.04 | 0.9503 | 19124843 |
| 6:160735746 | rs410569   | G | 1142 | -0.0025 | 0.04 | 0.9523 | 19124843 |
| 6:165316048 | rs6455970  | G | 1147 | -0.0034 | 0.07 | 0.9581 | 19124843 |
| 6:161207892 | rs2115869  | G | 1119 | -0.0021 | 0.04 | 0.9587 | 19124843 |
| 9:5883409   | rs10733517 | G | 1147 | -0.0022 | 0.05 | 0.9643 | 17903299 |
| 6:159202240 | rs744893   | C | 1101 | -0.0037 | 0.09 | 0.9688 | 19124843 |
| 6:163640262 | rs11966948 | C | 1123 | 0.0017  | 0.04 | 0.969  | 19124843 |
| 6:158812361 | rs705936   | A | 1094 | -0.0025 | 0.08 | 0.976  | 19124843 |
| 6:160738920 | rs667538   | G | 1125 | 0.0004  | 0.04 | 0.9917 | 19124843 |
| 6:156886655 | rs288944   | T | 1118 | -0.0004 | 0.07 | 0.9955 | 19124843 |
| 6:162609719 | rs9295184  | C | 1120 | -0.0002 | 0.05 | 0.9963 | 19124843 |

---

**Supplemental Figure**

**Supplemental Fig. S1 Flow chart of screening study subjects.**

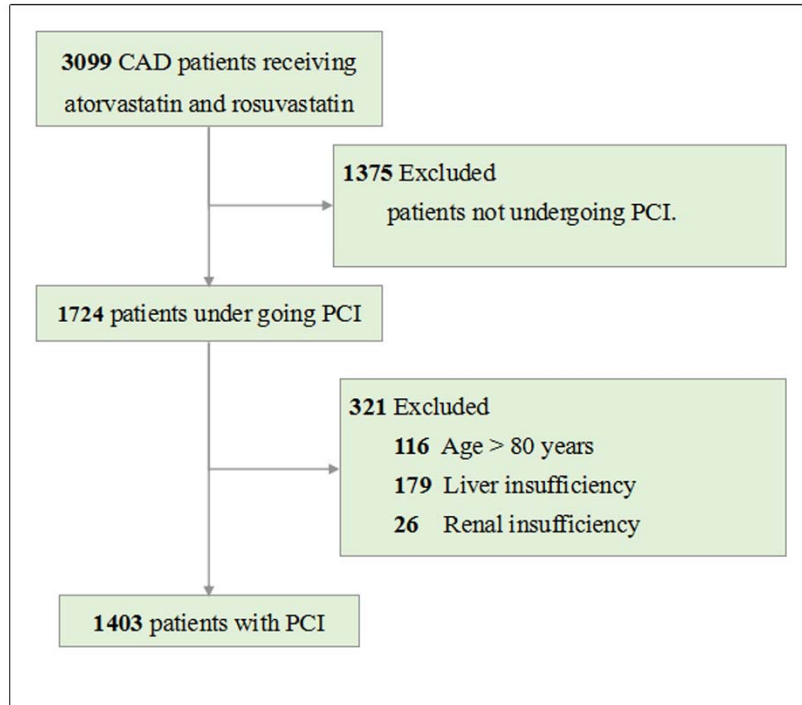

Supplemental Fig. S2 Flow chart of genotype data processing

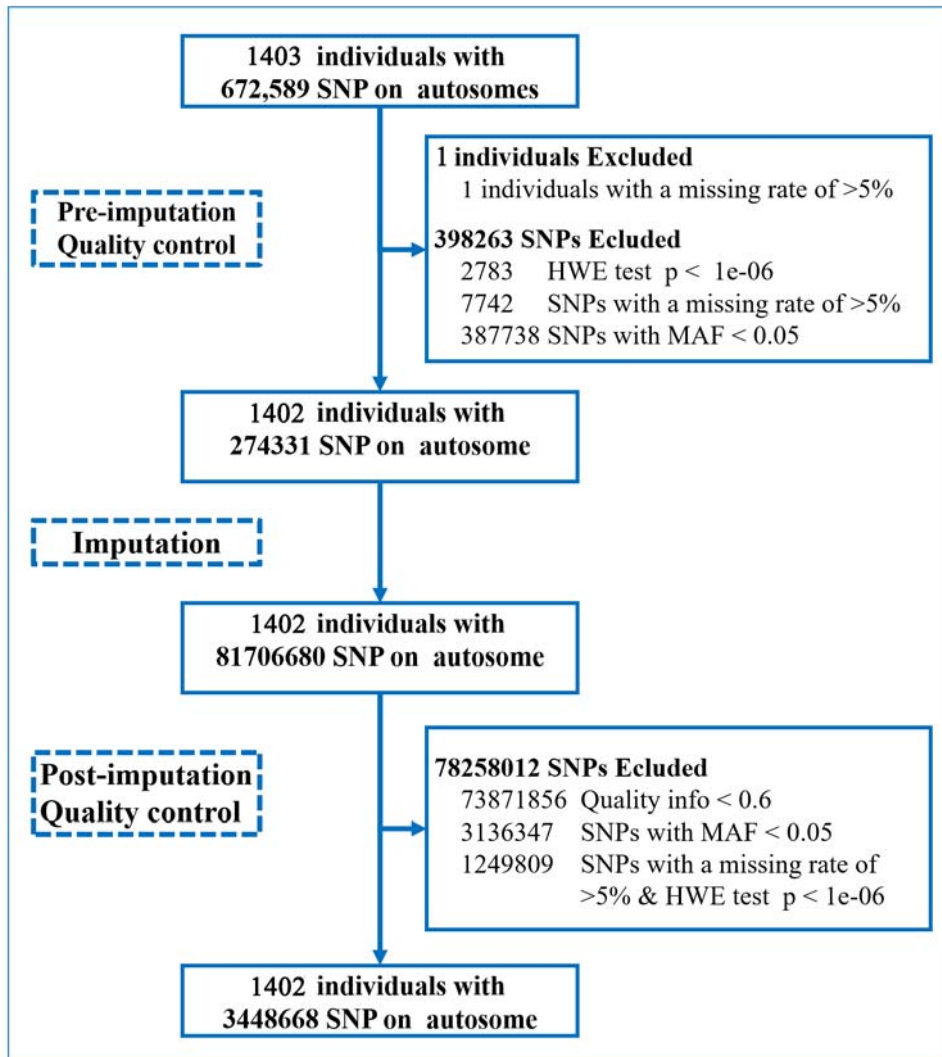



Supplemental Fig. S3 Manhattan plots of further genome wide association analysis on Lp(a) level.

Manhattan Plots of Genome Wide Association Analysis on Lipoprotein(a) Level

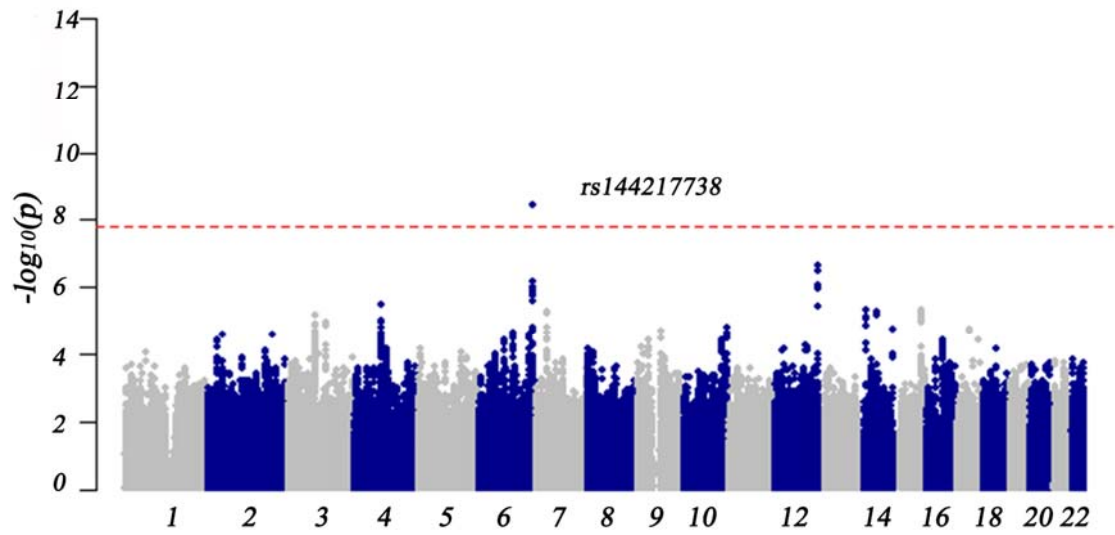

**Supplemental Fig. S4 Correlation plot of KIV-2 and Lp(a) levels**

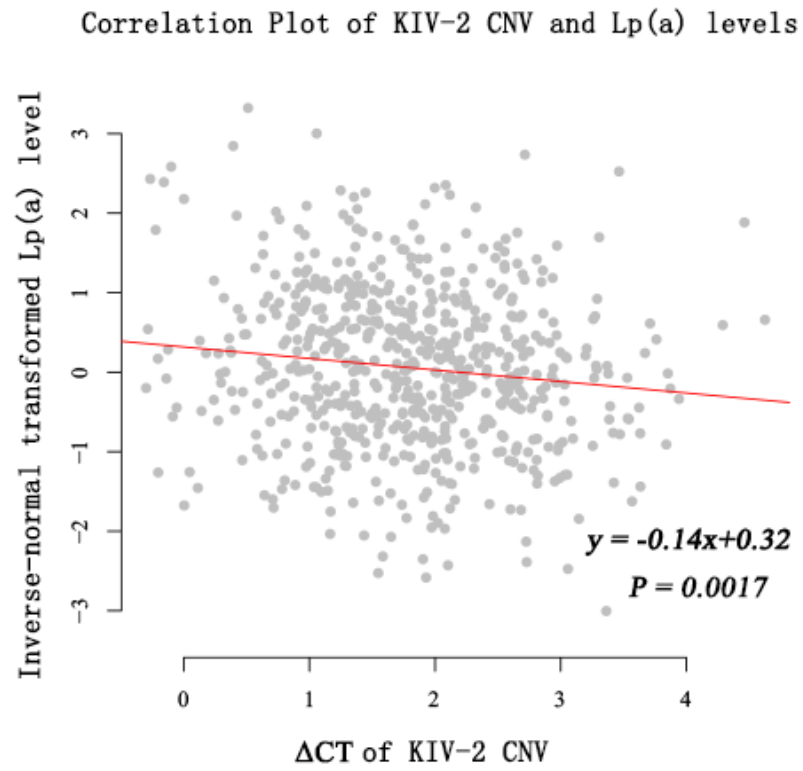

Supplement: 10.1194_P091009_jlr.P091009-1.pdf [file 10.1194_P091009_jlr.P091009-1.pdf]
